# Supplementary material for: Relationship between residual visual field and full-field stimulus testing in patients with late-stage retinal degenerative diseases
Source: PubMed Central journal article supplement (PMC10837419; doi:10.1038/s41598-024-53474-6), 2024-02-02

# **Relationship between residual visual field and full-field stimulus testing in patients with late-stage retinal degenerative diseases**

Daiki Sakai<sup>1,2,3\*</sup> MD, Tadao Maeda<sup>1</sup> MD, PhD, Midori Yamamoto<sup>1</sup> BA, Satoshi Yokota<sup>1,2</sup> MD, PhD, Akiko Maeda<sup>1,2</sup> MD, PhD, Yasuhiko Hiramami<sup>1,2</sup> MD, PhD, Makoto Nakamura<sup>3</sup> MD, PhD, Yasuo Kurimoto<sup>1,2</sup> MD, PhD, Michiko Mandai<sup>1,2</sup> MD, PhD

<sup>1</sup>Department of Ophthalmology, Kobe City Eye Hospital, Kobe, Japan

<sup>2</sup>Department of Ophthalmology, Kobe City Medical Center General Hospital, Kobe, Japan

<sup>3</sup>Department of Surgery, Division of Ophthalmology, Kobe University Graduate School of Medicine, Kobe, Japan

## **Supplementary Information**

# Supplementary Table S1. Profiles and findings of included 35 eyes from 19 patients.

| Eye ID | Analyzed eye | Patient ID | Age | Sex | Diagnosis                    | Causative gene | Eye | Lens status | BCVA | Blue  | Red   | Blue-Red      | Mediation | Rod sensitivity | Cone sensitivity | Retinal sensitivity | VF area (%) | Final isopter | Peripheral island | Central island | Only peripheral island | Only central island | Both | None | Mean CRT | Confounding diseases   |
|--------|--------------|------------|-----|-----|------------------------------|----------------|-----|-------------|------|-------|-------|---------------|-----------|-----------------|------------------|---------------------|-------------|---------------|-------------------|----------------|------------------------|---------------------|------|------|----------|------------------------|
| E1     | No           | P1         | 66  | M   | RP                           | RPGR           | L   | cataract    | HM   | 11.3  | 11.5  | 0.2           | C         | NA              | 11.5             | 11.5                | 0.31%       | IV/4e         | No                | Yes            | No                     | Yes                 | No   | No   | 156.5    |                        |
| E2     | Yes          | P1         | 66  | M   | RP                           | RPGR           | R   | cataract    | 0.01 | 11.7  | 11.3  | -0.4          | C         | NA              | 11.3             | 11.3                | 0.80%       | III/4e        | No                | Yes            | No                     | Yes                 | No   | No   | NA       | Cystoid macular edema  |
| E3     | No           | P2         | 83  | M   | RP                           | NA             | R   | IOL         | HM   | 3.0   | -6.6  | -9.6          | C         | NA              | -6.6             | -6.6                | 5.60%       | III/4e        | Yes               | No             | Yes                    | No                  | No   | No   | 84       |                        |
| E4     | Yes          | P2         | 83  | M   | RP                           | NA             | L   | IOL         | FC   | -30.6 | -5.5  | 25.1          | R         | -30.6           | NA               | -30.6               | 6.17%       | III/4e        | Yes               | No             | Yes                    | No                  | No   | No   | 185.5    |                        |
| E5     | No           | P3         | 54  | F   | RP                           | NA             | L   | IOL         | HM   | -5.1  | 2.1   | 7.2           | M         | -5.1            | 2.1              | -5.1                | 5.44%       | IV/4e         | Yes               | Yes            | No                     | No                  | Yes  | No   | 89       |                        |
| E6     | Yes          | P3         | 54  | F   | RP                           | NA             | R   | cataract    | HM   | 1.6   | 3.4   | 1.8           | C         | NA              | 3.4              | 3.4                 | 7.91%       | III/4e        | Yes               | No             | Yes                    | No                  | No   | No   | 108.5    |                        |
| E7     | No           | P4         | 59  | M   | RP                           | RPGR           | R   | cataract    | LP   | 7.2   | 7.6   | 0.4           | C         | NA              | 7.6              | 7.6                 | 0.13%       | III/4e        | No                | Yes            | No                     | Yes                 | No   | No   | 27       |                        |
| E8     | Yes          | P4         | 59  | M   | RP                           | RPGR           | L   | cataract    | 0.02 | 8.6   | 9.1   | 0.5           | C         | NA              | 9.1              | 9.1                 | 0.25%       | III/4e        | No                | Yes            | No                     | Yes                 | No   | No   | 72.5     |                        |
| E9     | Yes          | P5         | 47  | M   | RP                           | NA             | L   | cataract    | LP   | -9.8  | 2.8   | 12.6          | M         | -9.8            | 2.8              | -9.8                | 0.00%       | NA            | No                | No             | No                     | No                  | No   | Yes  | 65       |                        |
| E10    | No           | P5         | 47  | M   | RP                           | NA             | R   | IOL         | LP   | 4.8   | 13.4  | 8.6           | M         | 4.8             | 13.4             | 4.8                 | 0.00%       | NA            | No                | No             | No                     | No                  | No   | Yes  | 100.5    |                        |
| E11    | No           | P6         | 79  | M   | RP                           | NA             | L   | IOL         | LP   | 5.5   | 8.4   | 2.9           | C         | NA              | 8.4              | 8.4                 | 0.07%       | IV/4e         | Yes               | No             | Yes                    | No                  | No   | No   | 133.5    |                        |
| E12    | Yes          | P6         | 79  | M   | RP                           | NA             | R   | IOL         | 0.03 | 0.6   | 6.6   | 6.0           | M         | 0.6             | 6.6              | 0.6                 | 0.26%       | II/4e         | Yes               | No             | Yes                    | No                  | No   | No   | 117      |                        |
| E13    | No           | P7         | 71  | F   | RP                           | NA             | R   | IOL         | HM   | 8.0   | 6.7   | 1.3           | C         | NA              | 6.7              | 6.7                 | 0.19%       | IV/4e         | No                | Yes            | No                     | Yes                 | No   | No   | 70       |                        |
| E14    | Yes          | P7         | 71  | F   | RP                           | NA             | L   | IOL         | HM   | 6.2   | 2.7   | -3.5          | C         | NA              | 2.7              | 2.7                 | 0.22%       | IV/4e         | No                | Yes            | No                     | Yes                 | No   | No   | 74.5     |                        |
| E15    | No           | P8         | 50  | M   | RP                           | RPGR           | L   | cataract    | LP   | -13.0 | n/a   | NA(over 19.3) | R         | -13.0           | NA               | -13.0               | 0.00%       | NA            | No                | No             | No                     | No                  | No   | Yes  | NA       | Vitreomacular traction |
| E16    | Yes          | P8         | 50  | M   | RP                           | RPGR           | R   | cataract    | HM   | -14.9 | 7.4   | 22.3          | R         | -14.9           | NA               | -14.9               | 0.91%       | IV/4e         | Yes               | No             | Yes                    | No                  | No   | No   | NA       | Vitreomacular traction |
| E17    | No           | P9         | 58  | M   | RP                           | unsolved       | R   | cataract    | 0.02 | -35.4 | -12.1 | 23.3          | R         | -35.4           | NA               | -35.4               | 2.92%       | IV/4e         | Yes               | No             | Yes                    | No                  | No   | No   | 63.5     |                        |
| E18    | Yes          | P9         | 58  | M   | RP                           | unsolved       | L   | cataract    | 0.01 | -37.4 | -13.9 | 23.5          | R         | -37.4           | NA               | -37.4               | 9.23%       | III/4e        | Yes               | No             | Yes                    | No                  | No   | No   | 76.5     |                        |
| E19    | No           | P10        | 71  | F   | RP                           | NA             | R   | IOL         | LP   | -14.6 | 2.0   | 16.6          | M         | -14.6           | 2.0              | -14.6               | 0.00%       | NA            | No                | No             | No                     | No                  | No   | Yes  | 86       |                        |
| E20    | Yes          | P10        | 71  | F   | RP                           | NA             | L   | IOL         | 0.01 | -37.8 | -13.0 | 24.8          | R         | -37.8           | NA               | -37.8               | 0.22%       | III/4c        | No                | Yes            | No                     | Yes                 | No   | No   | 95       |                        |
| E21    | No           | P11        | 61  | F   | RP                           | RHO            | R   | IOL         | LP   | -0.5  | 4.4   | 4.9           | M         | -0.5            | 4.4              | -0.5                | 0.15%       | I/4e          | No                | Yes            | No                     | Yes                 | No   | No   | 75.5     |                        |
| E22    | Yes          | P11        | 61  | F   | RP                           | RHO            | L   | IOL         | LP   | 0.0   | 9.4   | 9.4           | M         | 0.0             | 9.4              | 0.0                 | 0.28%       | I/4e          | No                | Yes            | No                     | Yes                 | No   | No   | 55.5     |                        |
| E23    | No           | P12        | 59  | M   | RP                           | NA             | R   | cataract    | HM   | -46.5 | -18.1 | 28.4          | R         | -46.5           | NA               | -46.5               | 9.02%       | III/4c        | Yes               | No             | Yes                    | No                  | No   | No   | 19.5     |                        |
| E24    | Yes          | P12        | 59  | M   | RP                           | NA             | L   | cataract    | HM   | -48.8 | -17.2 | 31.6          | R         | -48.8           | NA               | -48.8               | 12.37%      | III/4c        | Yes               | No             | Yes                    | No                  | No   | No   | 35.5     |                        |
| E25    | No           | P13        | 54  | F   | RP                           | unsolved       | R   | cataract    | 0.01 | 2.4   | 9.2   | 6.8           | M         | 2.4             | 9.2              | 2.4                 | 6.12%       | IV/4e         | Yes               | Yes            | No                     | No                  | Yes  | No   | 43       |                        |
| E26    | Yes          | P13        | 54  | F   | RP                           | unsolved       | L   | cataract    | HM   | 3.9   | 8.1   | 4.2           | M         | 3.9             | 8.1              | 3.9                 | 8.09%       | IV/4e         | Yes               | Yes            | No                     | No                  | Yes  | No   | 14.5     |                        |
| E27    | No           | P14        | 55  | M   | RP                           | unsolved       | R   | cataract    | LP   | 11.3  | 11.4  | 0.1           | C         | NA              | 11.4             | 11.4                | 1.34%       | V/4e          | Yes               | No             | Yes                    | No                  | No   | No   | 44.5     |                        |
| E28    | Yes          | P14        | 55  | M   | RP                           | unsolved       | L   | cataract    | LP   | 4.9   | 8.3   | 3.4           | C         | NA              | 8.3              | 8.3                 | 2.57%       | III/4e        | Yes               | Yes            | No                     | No                  | Yes  | No   | 54       |                        |
| E29    | No           | P15        | 54  | F   | Stargardt disease            | ABCA4          | L   | cataract    | HM   | -37.8 | -13.0 | 24.8          | R         | -37.8           | NA               | -37.8               | 9.40%       | IV/4e         | Yes               | No             | Yes                    | No                  | No   | No   | 78       |                        |
| E30    | Yes          | P15        | 54  | F   | Stargardt disease            | ABCA4          | R   | cataract    | HM   | -37.1 | -12.8 | 24.3          | R         | -37.1           | NA               | -37.1               | 10.94%      | III/4e        | Yes               | No             | Yes                    | No                  | No   | No   | 75.5     |                        |
| E31    | No           | P16        | 61  | F   | RP                           | unsolved       | R   | IOL         | HM   | -12.1 | 6.4   | 18.5          | M         | -12.1           | 6.4              | -12.1               | 1.04%       | IV/4e         | Yes               | Yes            | No                     | No                  | Yes  | No   | 127.5    |                        |
| E32    | Yes          | P16        | 61  | F   | RP                           | unsolved       | L   | IOL         | HM   | -11.1 | 9.0   | 20.1          | R         | -11.1           | NA               | -11.1               | 1.06%       | III/4e        | Yes               | Yes            | No                     | No                  | Yes  | No   | 116.5    |                        |
| E33    | Yes          | P17        | 58  | F   | RP                           | unsolved       | R   | IOL         | HM   | 10.7  | 14.6  | -3.9          | C         | NA              | 14.6             | 14.6                | 3.91%       | IV/4e         | Yes               | No             | Yes                    | No                  | No   | No   | 139      |                        |
| E34    | Yes          | P18        | 76  | F   | Bietti crystalline dystrophy | NA             | R   | IOL         | 0.03 | 0.6   | 1.5   | 0.9           | C         | NA              | 1.5              | 1.5                 | 2.06%       | III/4e        | Yes               | Yes            | No                     | No                  | Yes  | No   | 72.5     |                        |
| E35    | Yes          | P19        | 30  | M   | RP                           | MERTK          | L   | IOL         | 0.04 | 0.0   | 0.6   | 0.6           | C         | NA              | 0.6              | 0.6                 | 1.38%       | III/4e        | Yes               | Yes            | No                     | No                  | Yes  | No   | 52.5     |                        |

BCVA, best-corrected visual acuity; VF, visual field; CRT, central retinal thickness; RP, retinitis pigmentosa; IOL, intraocular lens; FC, finger count; HM, hand motion; LP, light perception; R, rod; C, cone; M, mixed; NA, not available.

**Supplementary Figure S1.** Scatterplots showing the relationship between central retinal thickness (CRT) on optical coherence tomography and retinal sensitivity detected using full-field stimulus testing. (a) Relationship between the CRT and rod sensitivity. (b) Relationship between the CRT and cone sensitivity. (c) Relationship between the CRT and retinal sensitivity.

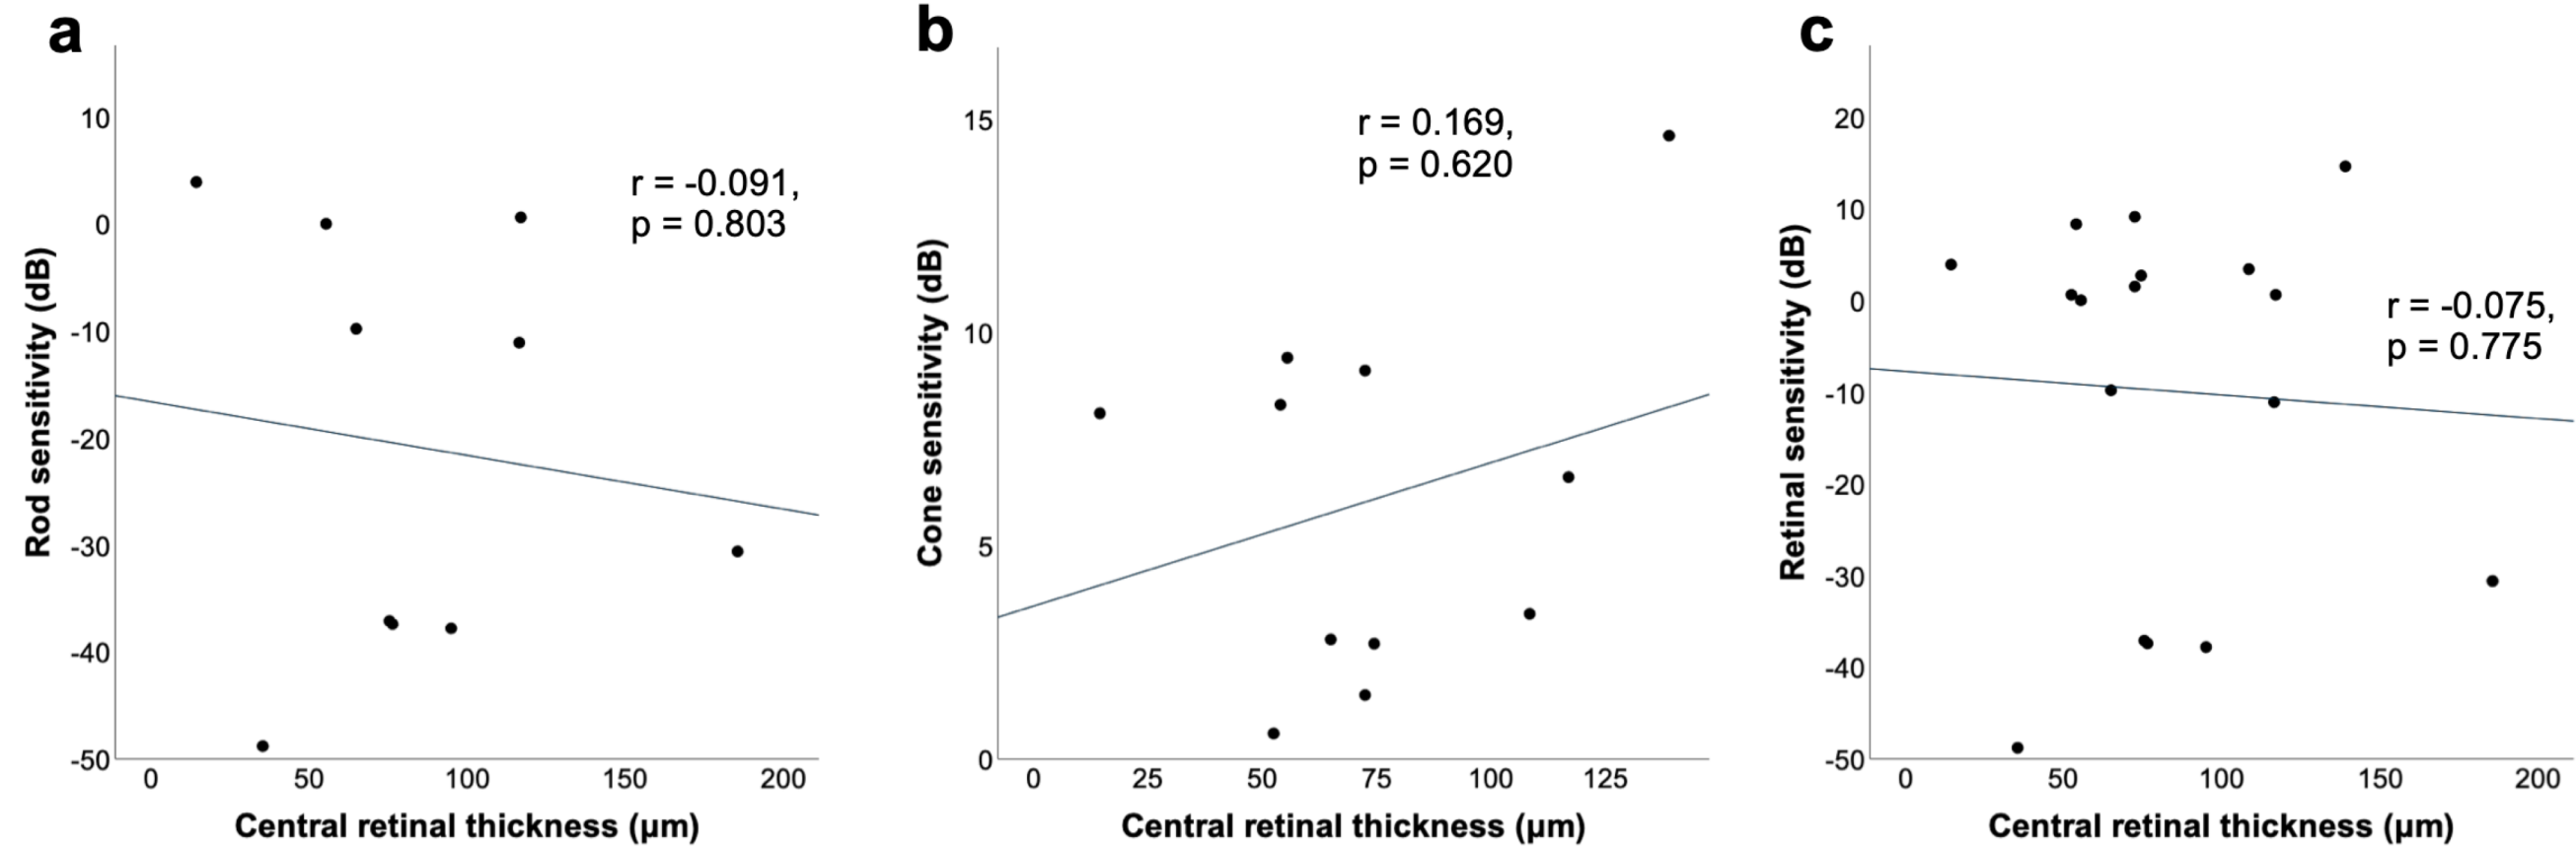

**Supplementary Table S2.** Visual field area and retinal sensitivity on full-field stimulus testing in patients whose both eyes had only peripheral visual islands.

| Patient ID | Eye ID | Analyzed eye | Age | Sex | Diagnosis         | Eye | VF area (%) |        | Retinal sensitivity (dB) |        | Consistency  |
|------------|--------|--------------|-----|-----|-------------------|-----|-------------|--------|--------------------------|--------|--------------|
| P2         | E3     | No           | 83  | M   | RP                | R   | 5.60%       | worse  | -6.6                     | worse  | consistent   |
|            | E4     | Yes          | 83  | M   | RP                | L   | 6.17%       | better | -30.6                    | better |              |
| P6         | E11    | No           | 79  | M   | RP                | L   | 0.07%       | worse  | 8.4                      | worse  | consistent   |
|            | E12    | Yes          | 79  | M   | RP                | R   | 0.26%       | better | 0.6                      | better |              |
| P9         | E17    | No           | 58  | M   | RP                | R   | 2.92%       | worse  | -35.4                    | worse  | consistent   |
|            | E18    | Yes          | 58  | M   | RP                | L   | 9.23%       | better | -37.4                    | better |              |
| P12        | E23    | No           | 59  | M   | RP                | R   | 9.02%       | worse  | -46.5                    | worse  | consistent   |
|            | E24    | Yes          | 59  | M   | RP                | L   | 12.37%      | better | -48.8                    | better |              |
| P15        | E29    | No           | 54  | F   | Stargardt disease | L   | 9.40%       | worse  | -37.8                    | better | inconsistent |
|            | E30    | Yes          | 54  | F   | Stargardt disease | R   | 10.94%      | better | -37.1                    | worse  |              |

VF, visual field; RP, retinitis pigmentosa.

**Supplementary Figure S2.** Goldmann perimetry and full-field stimulus testing (FST) results of the right eye of a 71-year-old woman diagnosed with retinitis pigmentosa (E19).

**E19**

**FST**  
 Blue: -14.6 dB  
 Red: 2.0 dB

Mediation:  
 Mixed

Rod: -14.6 dB  
 Cone: 2.0 dB

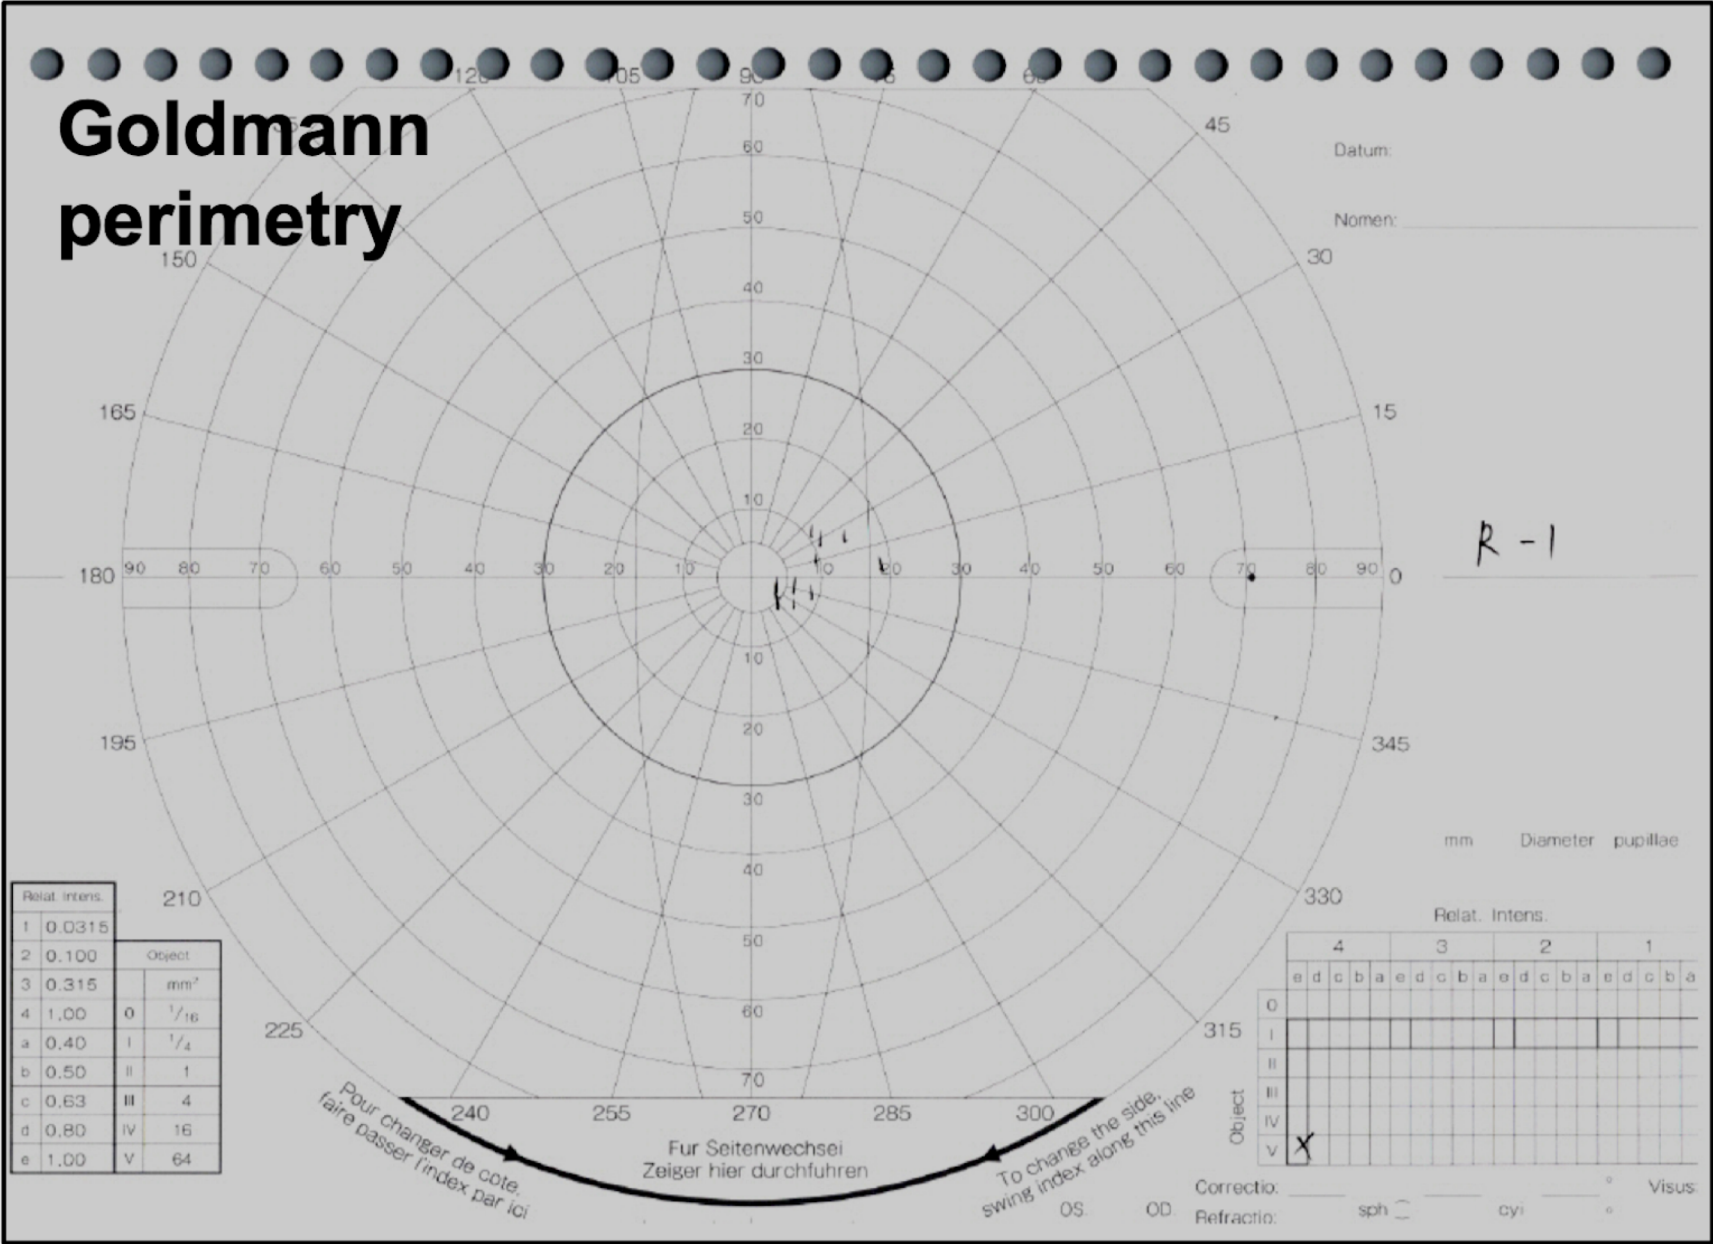

**Supplementary Figure S3.** Goldmann perimetry and full-field stimulus testing (FST) results of the right eye of a 83-year-old man diagnosed with retinitis pigmentosa (E3).

**E3**

**FST**  
 Blue: 3.0 dB  
 Red: -6.6 dB

Mediation: Cone  
 Rod: NA  
 Cone: -6.6 dB

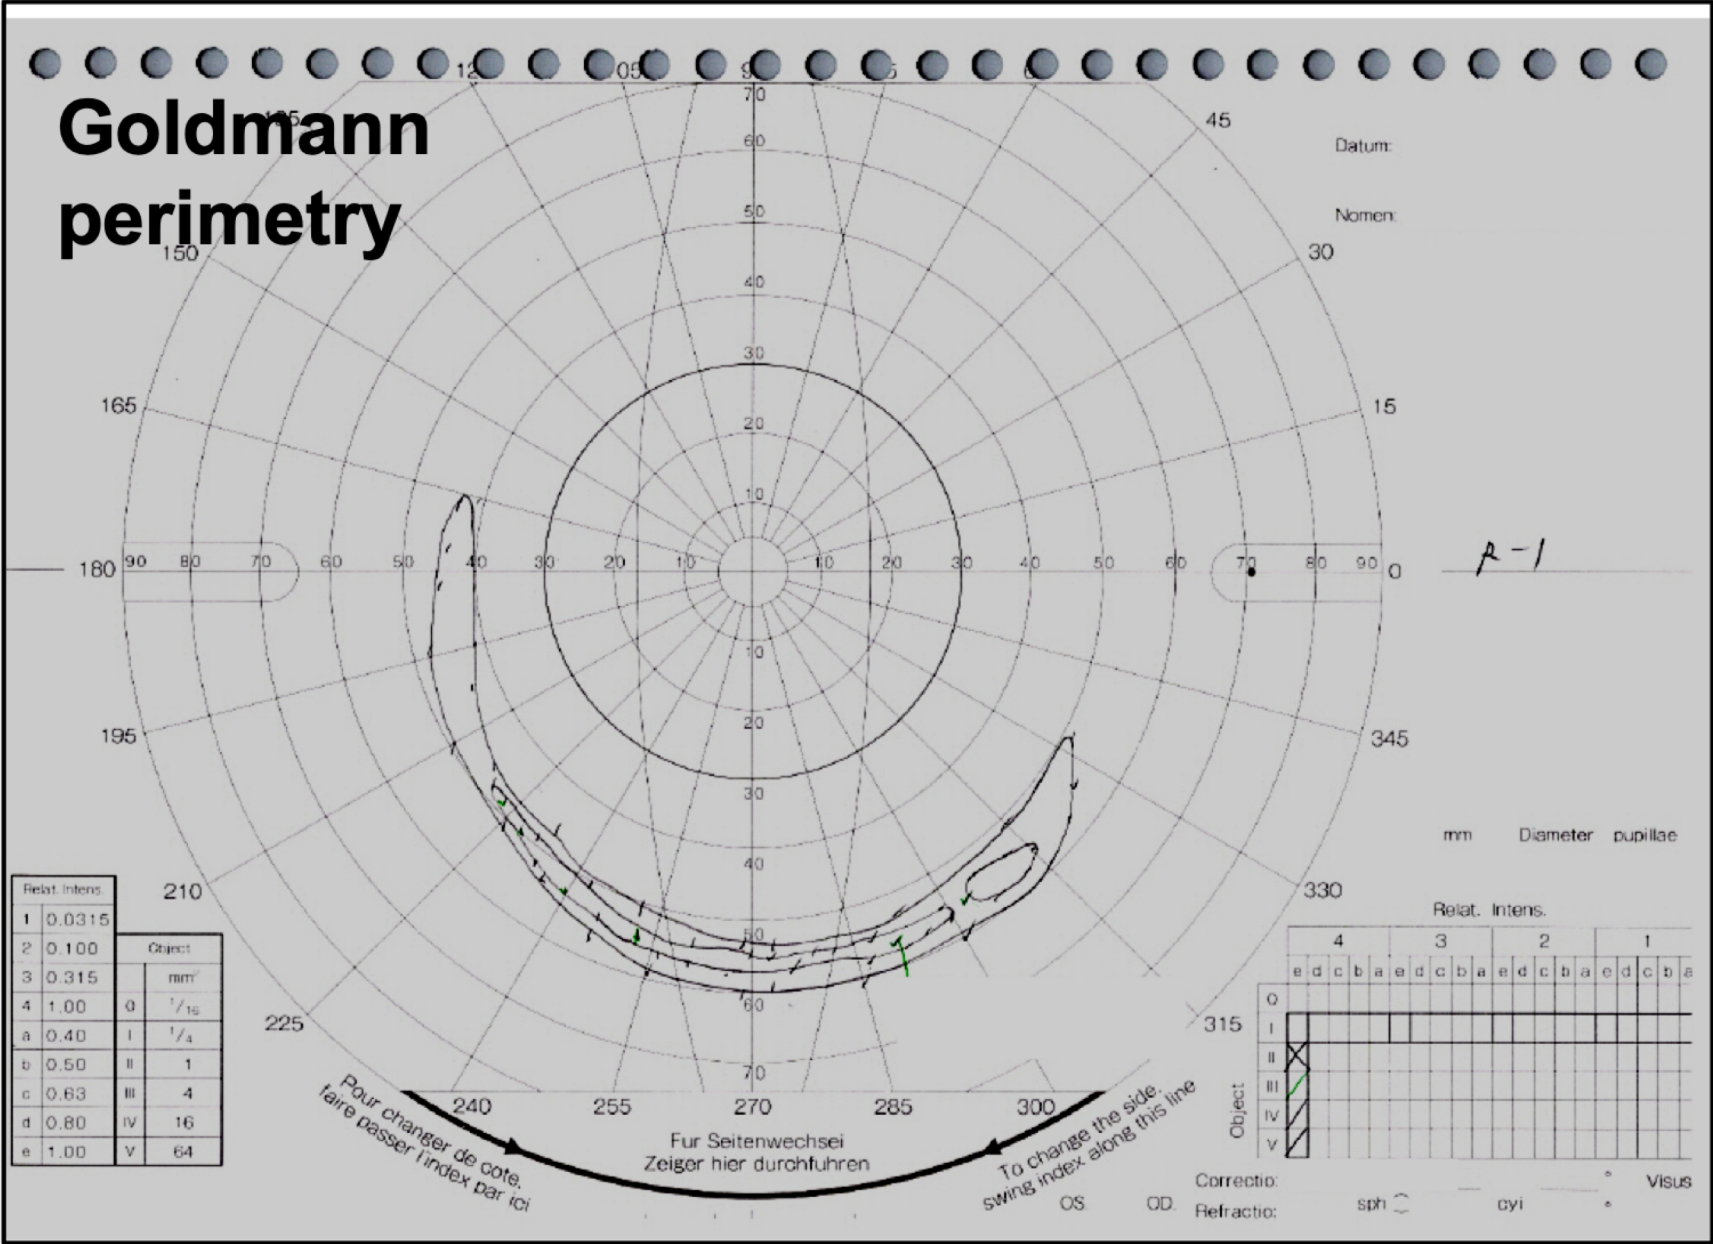

Supplement: 41598_2024_53474_MOESM1_ESM.pdf [file 41598_2024_53474_MOESM1_ESM.pdf]
